# Supplementary material
Source: MDPI journal article supplement (https://www.mdpi.com/2076-3263/14/8/206)
Supplement: s1 [file s1]

## Sheet: Table S1
	Table S1. Compositions of mineral inclusions in zircons from granitic gneiss (sample 2218) by SEM-EDS.
	Sample	Mineral	Spot	SiO2	TiO2	Al2O3	FeO*	MnO	MgO	CaO	Na2O	K2O	BaO	P2O5	Cl	F	Total
	2218	Ep	1	40.85	0.12	28.43	7.71	-	-	23.63	-	-	-	-	-	-	100.74
	2218	Fsp	2	65.31	-	18.53	-	-	-	-	0.49	16.06	0.17	-	-	-	100.56
	2218	Ap	4	2.13	-	0.23	-	-	-	52.16	-	-	-	42.93	-	2.55	100
	2218	Cpx	5	52.81	-	3.74	11.87	0.31	8.23	20.38	2.65	-	-	-	-	-	99.99
	2218	Png	18	45.34	0.43	24.58	3.52	-	2.25	-	-	10.43	-	-	-	-	86.55
	2209	Amp	5	46.52	0.34	14.36	7.42	0.04	13.59	10	3.07	0.49	-	-	-	-	95.83
	2209	Amp	13	47.5	0.86	13.99	7.62	0.05	14.01	10.61	3.01	0.33	-	-	-	-	97.98
	2209	Amp	16	47.99	0.36	12.37	6.93	0.05	15.17	10.36	2.54	0.43	-	-	-	-	96.2
	2209	Amp	19	48.84	0.43	12.43	6.84	-	14.53	10.29	2.76	0.49	-	-	0.13	-	96.74
	2209	Amp	22	46.5	0.27	12.02	9.85	0.2	12.92	10.51	3.33	0.1	-	-	0.1	-	95.8
	2209	Bt	2	39.22	1.2	17.18	9.46	0.22	15.52	-	0.17	9.78	-	-	0.23	-	92.98
	2209	Bt	9	42.04	1.45	18.7	8.27	0.23	19.02	-	0.3	9.99	-	-	-	-	100
	2209	Bt	17	40.2	1.13	17.1	7.1	0.05	18.31	-	0.99	8.01	-	-	-	-	92.89
	2209	Bt	18	39.27	0.39	17.64	10.32	-	16.84	-	1.05	7.69	-	-	0.24	-	93.44
	2209	Bt	24	38.43	1.43	17.17	8.74	-	16.31	-	0.53	8.7	-	-	0.18	-	91.49
	2209	Bt	26	38.19	0.67	16.86	11.95	0.17	15.43	-	0.48	9.49	-	-	0.27	-	93.51
	2209	Fsp	23	65.74	-	17.54	-	-	-	-	0.16	16.56	-	-	-	-	100
	2209	Grt	20	39.23	-	21.37	24.63	1.43	6.59	6.76	-	-	-	-	-	-	100.01
	2209	Png	7	48.72	0.72	30.15	1.33	0.02	2.44	-	0.97	9.9	-	-	-	-	94.25
	2209	Png	11	49.88	0.75	29.79	2.83	-	4.82	-	1.2	10.73	-	-	-	-	100
	2209	Png	25	47.94	0.53	30.71	1.18	0.07	1.96	-	1.64	8.9	-	-	-	-	92.93
	2209	Png	27	49.59	0.81	29.38	1.73	-	2.73	-	1.1	10.53	-	-	-	-	95.87
	2209	Png	1	47.89	0.63	30.55	1.09	-	2.2	-	1.34	9.57	-	-	-	-	93.27
	2209	Opx	4	58.4	-	6.38	6.24	0.22	28.12	-	0.65	-	-	-	-	-	100.01

## Sheet: Table S2
	Table S2. Trace elements composition of representative zircons from granitic gneiss (sample 2218) by SIMS (in ppm).
		core (magmatic zircon)													rim (eclogitic zircon)
	Point	1	3	4	6	7	9	11	12	13	15	17	19	21	2	5	8	10	14	16	18	20
	La	9.43068	0.204928	31.4736	71.9601	0.522366	0.266902	7.63957	2.9834	0.191071	0.55725	0.672453	3.92139	0.178699	5.48663	10.2777	2.96615	8.23745	0.710997	18.5517	1.38328	1.37132
	Ce	207.109	73.6542	454.861	463.693	25.17	34.8715	195.417	84.9921	49.9777	85.4377	86.4675	83.784	63.6842	397.579	67.6202	25.5489	57.7424	8.86089	24.8577	74.2598	4.56449
	Pr	6.66924	1.29351	24.2641	27.6106	0.440053	0.553323	5.87094	2.197	0.502435	0.994374	0.839594	3.14109	0.445701	8.28526	7.84895	1.92339	5.82717	0.702607	5.47341	1.68282	0.463871
	Nd	54.6826	20.3123	167.156	146.029	3.86182	6.73651	41.4242	13.974	7.12211	11.9346	8.4968	24.7018	7.46214	32.3955	45.4669	13.2312	38.7907	5.97666	27.9459	6.55932	2.58176
	Sm	52.4232	36.5648	106.506	34.1629	4.55391	11.3593	16.5329	6.33944	14.3812	17.5911	10.2823	15.7232	15.9707	10.7496	18.4601	5.94036	9.49702	2.27659	6.05203	2.48251	0.730257
	Eu	5.50859	4.13093	15.1737	3.06408	0.688541	1.65084	3.12882	0.548897	1.2739	1.92666	0.972509	2.27297	1.82033	2.0058	3.96892	1.01395	1.89408	3.14064	0.860886	0.440384	0.638206
	Gd	192.599	169.241	319.786	122.841	25.453	51.8005	50.2551	21.893	71.7059	93.1664	51.5031	50.3895	85.1433	13.6738	22.8503	9.42304	14.3497	2.91196	11.0463	5.20662	1.87605
	Dy	602.783	593.531	972.108	452.041	98.0148	167.797	156.294	67.9842	268.683	330.292	211.412	181.614	278.295	18.8461	35.4507	27.457	10.8005	7.57089	24.0805	13.5949	9.23674
	Er	1074.8	1034.93	1701.74	914.073	216.033	306.525	310.528	153.619	517.058	614.963	433.682	383.978	593.05	32.8167	50.822	50.2696	22.8029	20.2766	53.8375	34.2239	30.5655
	Yb	1740.79	1618.21	2595.33	1608.12	394.987	507.157	528.204	249.287	844.442	970.52	763.263	789.179	935.063	58.4743	84.177	97.2505	43.0499	40.1072	102.046	70.4756	62.0655
	Lu	263.264	253.24	396.47	247.463	65.5718	77.8015	88.1332	40.3469	128.753	153.696	123.353	137.56	145.498	9.97174	13.8234	17.4943	7.78465	6.49702	19.3174	12.8699	9.75918
	Eu/Eu*	0.167109	0.160071	0.250624	0.144178	0.194947	0.207449	0.330876	0.142024	0.120923	0.14507	0.128819	0.246152	0.150475	0.504305	0.58906	0.413106	0.494576	3.7182	0.32095	0.373385	1.66207
	Ce/Ce*	6.31795	34.6098	3.98209	2.51672	12.7008	21.953	7.05932	8.03147	39.0235	27.7675	27.8404	5.77548	54.593	14.2661	1.82143	2.5878	2.01631	3.03302	0.596798	11.7752	1.38456
	ΣREE	4210.06	3805.31	6784.87	4091.06	835.297	1166.52	1403.43	644.165	1904.09	2281.08	1690.94	1676.27	2126.61	590.285	360.766	252.518	220.776	99.0321	294.069	223.179	123.853
	ΣLREE	277.891	95.4649	677.755	709.293	29.9943	42.4283	250.352	104.147	57.7933	98.9239	96.4763	115.548	71.7707	443.747	131.214	43.6696	110.598	16.2512	76.8287	83.8852	8.98144
	ΣHREE	3874.24	3669.15	5985.43	3344.54	800.06	1111.08	1133.41	533.13	1830.64	2162.64	1583.21	1542.72	2037.05	133.783	207.123	201.895	98.7876	77.3637	210.328	136.371	113.503
	LuN/LaN	268.944	11905.4	121.36	33.1308	1209.36	2808.34	111.143	130.29	6491.97	2657.2	1767.26	337.961	7844.21	17.5097	12.9579	56.822	9.10457	88.0358	10.0318	89.6352	68.5626
	LuN/GdN	11.0574	12.1045	10.0293	16.2961	20.8399	12.1499	14.1866	14.9082	14.5252	13.345	19.3746	22.0836	13.8237	5.89927	4.89375	15.0184	4.3885	18.0487	14.1466	19.9957	42.0811
	SmN/LaN	8.90158	285.725	5.41895	0.760238	13.9604	68.1534	3.46551	3.40272	120.528	50.5509	24.4857	6.42078	143.116	3.13743	2.87624	3.20706	1.84621	5.12747	0.522401	2.87388	0.852753
	Li	8.33373	1.03947	4.58953	7.4847	0.987818	0.242487	1.63119	2.62086	2.89164	3.69886	4.04471	13.4178	2.9704	2.06352	2.20028	2.42989	1.09606	0.950719	2.43273	1.45612	1.15031
	P	947.716	628.582	1014.52	832.075	281.269	272.371	380.925	155.713	366.41	476.021	598.95	348.685	533.979	57.6155	25.5398	56.886	61.8643	47.8002	30.0493	110.498	59.0927
	Ca	607.201	2.92738	73.6871	223.931	13.0207	3.43103	10.789	4.13989	23.3777	139.452	4.08154	24.3766	45.4545	11.7056	26.0273	21.0164	19.1033	9.347	10.9467	3.08716	12.9693
	Ti	42.3733	6.42942	40.6166	20.7169	18.1409	17.7512	8.22063	5.24728	5.06411	8.66028	7.28408	11.333	8.27939	9.98317	17.1779	29.0355	10.5664	8.59395	11.6797	5.06135	4.65476
	Sr	2.62261	1.04296	3.11388	8.80259	0.559696	0.39684	1.02504	0.30211	0.609677	5.97134	0.713406	0.831197	0.804631	0.216648	0.64101	0.692756	0.335546	0.257967	0.507515	0.268018	0.404812
	Y	6074.81	6030.23	9591.94	5155.76	1168.62	1761.44	1674.78	814.539	2645.68	3684.96	2412.92	2046.12	2962.57	197.775	329.916	306.883	147.732	124.392	336.782	180.366	175.601
	Nb	69.0772	40.8808	55.0677	64.2577	23.0477	34.1023	17.2784	16.9027	19.9159	10.6271	16.473	24.4417	22.1702	40.545	30.7541	20.1474	11.5583	7.79246	11.5354	13.2993	10.2945
	Ba	6.83131	1.24999	9.57528	85.2419	1.70416	1.32065	28.6849	1.31849	1.40609	6.85721	1.85131	2.30528	1.3165	2.44633	3.20683	3.28743	2.14521	1.88672	1.0696	1.5264	1.26102
	Hf	9620.61	10051.3	10535.4	11043.9	10621.9	10438.3	9439.73	13927.8	12069.9	8662.71	9809.89	14059.8	9313.88	14818.8	13634.6	13546.3	13351.9	13247	13338.6	13256.6	13795.5
	T(Ti),⁰C	888.699	705.461	883.834	811.618	798.427	796.3	725.998	689.109	686.306	730.463	715.784	754.164	726.606	742.851	793.1	846.665	747.885	729.802	756.889	686.263	679.72

## Sheet: Table S3
	Table S3. Trace elements composition of representative zircons from selvage of pegmatite vein (sample 2209) by SIMS (in ppm).
		1st domain (magmatic zircon)						2nd domain (recrystallised zircon)		3rd domain (eclogitic zircon)									4th domain (pegmatitic zircon)
	Point	1	3	5	11	15	21	7	19	2	4	6	8	10	12	14	18	20	9	16	17	13	22
	La	0.0827703	0.180351	0.109587	0.0466117	0.0855215	0.0417624	0.0506395	0.0218701	0.105313	0.0295305	0.042394	0.0787693	0.0441227	0.0342412	0.090446	0.0994013	0.0500361	0.0887027	0.0653369	0.0500321	0.0614445	0.0106774
	Ce	18.5025	21.2929	22.0913	17.5694	50.054	34.7202	3.23578	1.60276	1.2276	1.15107	0.891449	1.11688	0.96335	1.46415	1.48372	1.01195	1.20736	1.73877	1.23541	1.52383	1.00835	1.67865
	Pr	0.159239	0.722098	0.631511	0.135752	0.288934	0.125858	0.033498	0.00209579	0.0574593	0.0134429	0.0152759	0.0223737	0.00890097	0.0310834	0.0758541	0.0423776	0.0248236	0.0176802	0.0182011	0.0167995	0.0115968	0.037822
	Nd	1.53088	10.1758	9.2927	1.88585	4.81024	2.38453	0.349396	0.217974	0.385337	0.133225	0.0372916	0.151085	0.111057	0.144265	0.355552	0.113787	0.154769	0.197356	0.048544	0.0912314	0.0687871	0.085374
	Sm	2.95886	12.0761	12.2718	3.77495	9.30894	5.21632	1.96681	1.06159	0.2155	0.527784	0.0897899	0.38434	0.145673	0.306042	0.34979	0.230697	0.482603	0.64223	0.517521	0.366459	0.232953	0.370358
	Eu	0.450842	2.27355	1.6654	0.735845	1.25814	0.72373	0.740612	0.436077	0.115406	0.167713	0.0368635	0.119561	0.0337232	0.129563	0.100506	0.0938404	0.179418	0.300927	0.18825	0.221026	0.10099	0.14808
	Gd	15.372	51.6254	47.0275	19.4398	50.9497	28.7591	10.1912	7.34484	1.10341	2.84391	0.843415	2.06521	1.27356	1.88303	1.49166	1.17443	2.60602	5.58535	4.18905	4.90505	2.9078	3.36919
	Dy	62.6903	179.562	140.634	70.2214	181.669	114.556	35.4732	11.8385	4.82717	5.68423	1.96481	6.79981	3.67374	10.9178	4.24067	5.02778	5.28595	44.2254	53.3192	58.3723	41.5978	38.7387
	Er	122.495	329.263	238.848	134.833	369.25	226.906	68.4322	7.09391	10.7316	4.92277	2.01483	8.01047	4.8761	34.3746	5.79502	15.7636	4.24472	181.142	304.118	349.303	237.438	205.526
	Yb	209.119	524.289	374.556	220.98	582.145	388.012	145.156	9.25618	23.2176	6.84117	5.51535	14.4951	11.0823	90.5232	11.9864	55.3956	5.27712	657.558	1208.26	1389.53	965.329	740.443
	Lu	33.9821	84.0821	60.7941	37.112	92.973	65.1408	22.637	1.36232	3.75854	1.01962	0.478995	2.07799	1.34344	18.4182	1.61516	17.2128	0.941292	128.222	247.533	277.829	191.269	138.944
	Eu/Eu*	0.203773	0.277561	0.211318	0.261839	0.176099	0.180118	0.50425	0.47604	0.721419	0.417283	0.40833	0.409072	0.23866	0.520247	0.424135	0.549546	0.487674	0.484328	0.38973	0.502525	0.374035	0.404083
	Ce/Ce*	38.9904	14.2747	20.316	53.4347	77.0353	115.861	19.0069	57.274	3.81789	13.9769	8.47479	6.43644	11.7604	10.8576	4.33366	3.7721	8.28803	10.6223	8.66701	12.7161	9.13879	20.2088
	ΣREE	467.344	1215.54	907.923	506.735	1342.79	866.585	288.267	40.2381	45.7449	23.3345	11.9305	35.3216	23.5559	158.226	27.5848	96.1662	20.4541	1019.72	1819.5	2082.21	1440.03	1129.35
	ΣLREE	20.2754	32.3712	32.1251	19.6376	55.2387	37.2723	3.66931	1.8447	1.77571	1.32727	0.986411	1.36911	1.12743	1.67374	2.00557	1.26752	1.43699	2.04251	1.36749	1.6819	1.15018	1.81252
	ΣHREE	443.658	1168.82	861.86	482.587	1276.99	823.373	281.89	36.8958	43.6383	21.3117	10.8174	33.4486	22.2491	156.117	25.1289	94.5742	18.3551	1016.73	1817.42	2079.94	1438.54	1127.02
	LuN/LaN	3955.38	4491.57	5344.59	7670.65	10473.6	15027.3	4306.69	600.126	343.837	332.647	108.853	254.155	293.338	5182.17	172.044	1668.3	181.24	13926.4	36499.6	53498.5	29989.9	125368
	LuN/GdN	17.8828	13.1752	10.4575	15.4433	14.7616	18.323	17.9685	1.50043	27.555	2.90029	4.59418	8.13947	8.53329	79.1236	8.75919	118.561	2.92189	185.708	478.008	458.197	532.106	333.604
	SmN/LaN	57.2448	107.225	179.323	129.689	174.306	200.016	62.1956	77.7306	3.27682	28.6202	3.39164	7.81349	5.28692	14.3126	6.19305	3.71651	15.4452	11.5942	12.684	11.729	6.07116	55.5447
	Li	0.416021	0.047208	0.0250493	0.0519636	0.0883995	0.0203279	0.280788	0.65747	1.22764	0.52265	0.574499	0.675677	0.605924	1.26125	1.04927	0.943859	0.425948	0.226969	0.126927	0.044508	0.20853	1.47478
	P	185.875	298.973	246.269	231.492	338.271	243.465	73.023	38.9792	75.0142	29.1595	49.8241	43.8486	12.714	86.6862	29.1325	45.9483	35.3409	151.607	189.521	112.123	173.981	121.828
	Ca	7.21013	8.52548	2.70715	3.41931	3.87045	3.13172	2.72956	2.22673	3.8698	4.41989	2.86569	2.59878	2.14485	3.50705	3.29589	3.65587	2.96939	3.18927	1.27235	2.52042	4.42522	2.98198
	Ti	37.6343	9.1019	20.9616	12.1484	6.86846	7.05276	6.28077	4.19359	2.90041	3.65914	1.99473	2.89167	2.02539	3.42577	3.33154	3.62171	3.27472	7.44166	5.53782	7.78477	5.35139	5.5698
	Sr	0.247091	1.81915	0.341571	0.338427	0.638553	0.530656	0.333898	0.149756	0.200605	0.15831	0.279501	0.124723	0.242103	0.225397	0.145952	0.224861	0.237082	0.626002	0.891292	0.90699	0.762114	0.632645
	Y	655.531	1909.1	1436.87	773.647	2117.58	1360.96	436.864	85.389	61.351	48.712	19.5049	68.4209	39.8096	174.145	44.3579	83.3474	46.5741	817.66	1167.54	1374.81	928.54	806.242
	Nb	42.8271	34.4638	19.992	13.733	8.80338	9.91879	52.223	9.57998	27.2929	33.2894	11.7882	15.9428	20.176	15.7921	15.1035	3.96682	9.93695	32.5816	16.3705	26.6961	11.729	21.3277
	Ba	1.21087	1.51859	0.740308	1.4129	1.55549	0.789181	1.65527	0.408377	0.827465	0.540224	0.594302	0.98701	0.609054	0.973722	1.06118	0.896508	0.751329	0.921138	0.807568	0.404191	0.491302	0.753025
	Hf	10345	9024.96	9666.98	9733.19	12071	12069.3	14411.9	15856.9	12856.5	14232	14073.5	13511.3	13365.5	15558.6	13018.9	14047.3	14418.1	15125.4	14961.4	14817.4	13229	14699.2
	T(Ti),⁰C	875.174	734.763	812.801	760.469	710.897	713.094	703.55	671.692	644.375	661.404	618.21	644.158	619.247	656.51	654.455	660.637	653.192	717.576	693.393	721.372	690.666	693.853

## Sheet: Table S4
	Table S4. Zircon U-Pb SIMS data (sample 2218)
	Spot	CL domain	%206Pbc	ppm U	ppm Th	232Th/238U	ppm206Pb*	(1)206Pb/238U Age, Ma		(1)207Pb/235U Age, Ma		% Discordant	±%	(1) 207Pb*/206Pb*	±%	(1) 207Pb*/235U	±%	(1) 206Pb*/238U	±%	err corr
	1*	core (magmatic zircon)	0.0341298	1556.75	3231.67	2.14497	101	468.5	± 3.8	467.798	± 4.1	-0.1499	0.84	0.0563	0.74	0.5852	1.1	0.07539	0.84	0.752382
	3		0.238162	589.561	1182.06	2.07169	38	465	± 4.0	460.598	± 6.7	-0.946621	0.88	0.05568	1.6	0.574	1.8	0.0748	0.88	0.492762
	4*		0.0385407	2123.31	5120.36	2.49172	139	472.6	± 3.8	474.692	± 3.8	0.442675	0.83	0.05682	0.63	0.596	1	0.07607	0.83	0.798512
	6*		0.316692	3537.91	4716.17	1.37739	232	472.8	± 3.7	470.868	± 8.3	-0.408701	0.81	0.0562	2	0.59	2.2	0.0761	0.81	0.369999
	7		0.389592	127.42	94.6716	0.767704	8.54	482.2	± 5.3	491.1	± 14.0	1.84573	1.1	0.0581	3.4	0.622	3.6	0.07767	1.1	0.313729
	9		0.557539	71.253	123.624	1.79272	4.83	486.6	± 6.5	468.95	± 21.0	-3.6272	1.4	0.0543	5.5	0.587	5.6	0.0784	1.4	0.246854
	11		0.120849	396.739	703.932	1.83332	26.7	486.1	± 4.3	487.965	± 7.4	0.383718	0.92	0.05715	1.6	0.617	1.9	0.07833	0.92	0.489693
	12*		0.14696	209.461	130.33	0.642916	13.7	473.7	± 4.9	471.506	± 9.1	-0.463148	1.1	0.0562	2.1	0.591	2.4	0.07626	1.1	0.450154
	13*		0.164658	602.717	853.433	1.46308	40.2	480.9	± 4.2	475.9	± 6.1	-1.03969	0.9	0.05598	1.3	0.5979	1.6	0.07745	0.9	0.557324
	15*		0.120061	800.81	1794.02	2.31478	52.8	475.9	± 4.0	472.973	± 5.3	-0.615071	0.88	0.05616	1.1	0.5933	1.4	0.07662	0.88	0.608323
	17		0.13082	537.866	657.24	1.26259	33.9	455.4	± 3.9	452.827	± 6.6	-0.564913	0.9	0.05571	1.6	0.562	1.8	0.0732	0.9	0.489925
	19		0.085416	1132.45	1010.45	0.921952	70.8	452.5	± 3.8	450.289	± 4.7	-0.488617	0.86	0.05566	0.95	0.5581	1.3	0.07272	0.86	0.67241
	21		0.218563	366.223	691.245	1.95029	24.7	485.6	± 4.6	479.136	± 8.4	-1.33118	0.98	0.0559	2	0.603	2.2	0.07824	0.98	0.448815
	2	rim (eclogitic zircon)	0.295396	105.467	2.41992	0.0237081	5.39	371.2	± 4.5	363.886	± 12.5	-1.97026	1.3	0.0528	3.9	0.431	4.1	0.05928	1.3	0.307301
	5		0.888014	72.9467	6.89984	0.0977341	3.74	370.2	± 5.4	419.793	± 24.1	13.3963	1.5	0.0628	6.9	0.512	7	0.05911	1.5	0.215369
	8		0.764619	71.0647	3.3115	0.0481486	3.6	366.8	± 5.4	403.547	± 22.3	10.0182	1.5	0.0605	6.6	0.488	6.7	0.05855	1.5	0.225349
	10		0.460223	60.9574	4.25879	0.0721893	3.08	366.5	± 5.7	366.721	± 19.7	0.0602094	1.6	0.0539	6.2	0.435	6.4	0.05851	1.6	0.251457
	16		0.669864	82.099	0.484946	0.00610335	4.12	363.8	± 5.1	349.595	± 20.1	-3.90461	1.4	0.0513	6.6	0.411	6.8	0.05806	1.4	0.212283
	18		5.26256	65.1646	1.64818	0.0261339	3.58	379.6	± 7.7	438.425	± 67.7	15.4965	2.1	0.065	19	0.54	19	0.0607	2.1	0.106987
	20		0.513016	51.5519	0.727061	0.0145727	2.67	375.7	± 6.1	363.886	± 21.7	-3.14443	1.7	0.0521	6.9	0.431	7.1	0.06	1.7	0.237584
	Errors are 1-sigma; Pbc and Pb* indicate the common and radiogenic portions, respectively.
	Error in standard calibration was 0.37% (not included in above errors but required when comparing data from different mounts).
	(1) Common Pb corrected using measured 204Pb.
	1* - spots used for age calculation

## Sheet: Table S5
	Table S5. Zircon U-Pb SIMS data (sample 2209)
	Spot	CL domain	%206Pbc	ppm U	ppm Th	232Th/238U	ppm 206Pb*	(1)206Pb/238U Age, Ma		(1)207Pb/235U Age, Ma		% Discordant	(1) 207Pb*/206Pb*	±%	(1) 207Pb*/235U	±%	(1) 206Pb*/238U	±%	err corr
	1	1-st domain (magmatic cores)	1.22368	31.6687	48.0787	1.56868	2.14	482.9	± 9.2	477.234	± 41.9	-1.17339	0.056	10	0.6	11	0.0778	2	0.184775
	3		0.459926	54.2638	102.329	1.9485	3.55	470.6	± 7.9	471.506	± 23.8	0.192534	0.0566	6	0.591	6.3	0.0757	1.7	0.27715
	5		0.529307	37.0667	82.1389	2.28969	2.46	477.7	± 8.3	481.034	± 26.1	0.697987	0.0572	6.6	0.606	6.8	0.0769	1.8	0.262906
	11		0.444431	44.4584	63.8673	1.48435	2.92	472.6	± 7.5	449.572	± 22.9	-4.87264	0.0531	6.1	0.557	6.3	0.0761	1.7	0.262617
	15		0.511385	94.7829	186.774	2.0361	6.2	470.6	± 5.8	466.388	± 17.2	-0.895123	0.0558	4.4	0.583	4.6	0.07574	1.3	0.279316
	21		0.482712	78.2437	67.8991	0.896658	4.97	457.9	± 6.5	456.072	± 19.5	-0.399113	0.0559	5.1	0.567	5.3	0.0736	1.5	0.278306
	7	2-nd domain (recrystallised cores)	0.20863	253.589	13.8455	0.0564143	12.8	368.6	± 3.9	359.62	± 8.8	-2.43623	0.0524	2.6	0.425	2.9	0.05884	1.1	0.382401
	19		0.272197	170.284	7.16232	0.0434603	8.6	367.3	± 4.1	363.177	± 10.4	-1.12263	0.0531	3.2	0.43	3.4	0.05863	1.2	0.340812
	9	3-rd domain (pegmatitic zircon)	0.224022	355.33	7.45486	0.0216781	17.7	361.8	± 3.6	361.755	± 7.6	-0.0123109	0.0538	2.2	0.428	2.5	0.05772	1	0.420613
	13		0.431355	73.6381	2.07029	0.0290497	3.73	367.4	± 5.3	370.957	± 19.9	0.968242	0.0545	6.2	0.441	6.4	0.05866	1.5	0.231698
	16		0.129611	366.247	5.35416	0.0151053	18.3	363	± 3.6	365.375	± 6.4	0.654371	0.0542	1.9	0.4331	2.1	0.05793	1	0.472267
	17		0.120122	402.328	4.93342	0.0126701	20	361.8	± 3.5	362.893	± 6.4	0.301964	0.05397	1.8	0.4296	2.1	0.05772	1	0.485593
	22		0.141466	542.224	7.97688	0.0152008	27.1	364.5	± 3.4	361.755	± 6.4	-0.75296	0.05336	1.9	0.428	2.1	0.05817	0.97	0.463266
	2	4-th domain (eclogitic zircon)	0.33027	160.165	2.32916	0.015026	8.07	366.3	± 4.3	368.841	± 11.8	0.693749	0.0543	3.6	0.438	3.8	0.05847	1.2	0.316416
	4		0.641691	111.423	3.20891	0.0297574	5.54	360.6	± 4.7	353.187	± 17.0	-2.0558	0.0524	5.5	0.416	5.7	0.05753	1.3	0.235704
	6		0.373291	71.012	1.8428	0.0268139	3.57	365.5	± 5.4	373.772	± 17.2	2.26319	0.0553	5.2	0.445	5.5	0.05834	1.5	0.280542
	8		0.426116	84.5459	2.72329	0.0332824	4.34	372.9	± 5.2	380.077	± 16.8	1.92452	0.0553	5.1	0.454	5.3	0.05955	1.4	0.271578
	10		0.272229	90.9993	2.70709	0.0307381	4.66	372.1	± 5.0	390.498	± 13.9	4.94435	0.0573	4.1	0.469	4.3	0.05941	1.4	0.320986
	12		0.123074	197.356	6.16674	0.0322863	10.1	373.6	± 4.1	380.077	± 8.9	1.73355	0.0551	2.5	0.454	2.8	0.05967	1.1	0.410491
	14		0.175536	281.423	4.27658	0.0157018	14.2	367.3	± 3.8	373.069	± 7.8	1.57066	0.055	2.3	0.444	2.5	0.05863	1.1	0.420262
	18		1.01858	60.7156	1.63345	0.0277983	3.16	375.2	± 5.8	380.077	± 29.5	1.29972	0.0549	9.2	0.454	9.3	0.05993	1.6	0.170004
	20		0.427042	108.564	3.1774	0.0302413	5.57	372.1	± 4.7	380.077	± 14.3	2.14365	0.0554	4.3	0.454	4.5	0.05942	1.3	0.285137
	Errors are 1-sigma; Pbc and Pb* indicate the common and radiogenic portions, respectively.
	Error in Standard calibration was 0.38%( not included in above errors but required when comparing data from different mounts).
	(1) Common Pb corrected using measured 204Pb.
